# Supplementary material
Source: PubMed Central journal article supplement (PMC9725071)
Supplement: EIJ-D-20-00345_Nakamura_SD.pdf [file EIJ-D-20-00345_Nakamura_SD.pdf]

**Supplementary data**

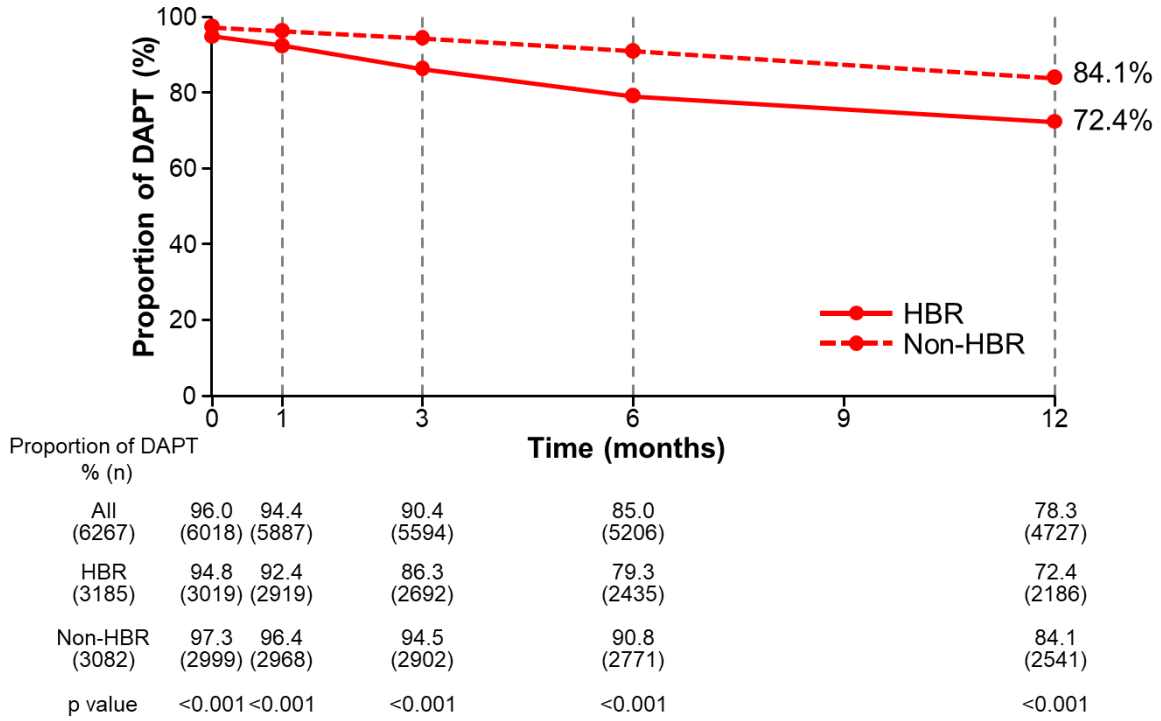

**Supplementary Figure 1.** Proportion of patients who continued to receive DAPT over time.

DAPT: dual antiplatelet therapy; HBR: high bleeding risk

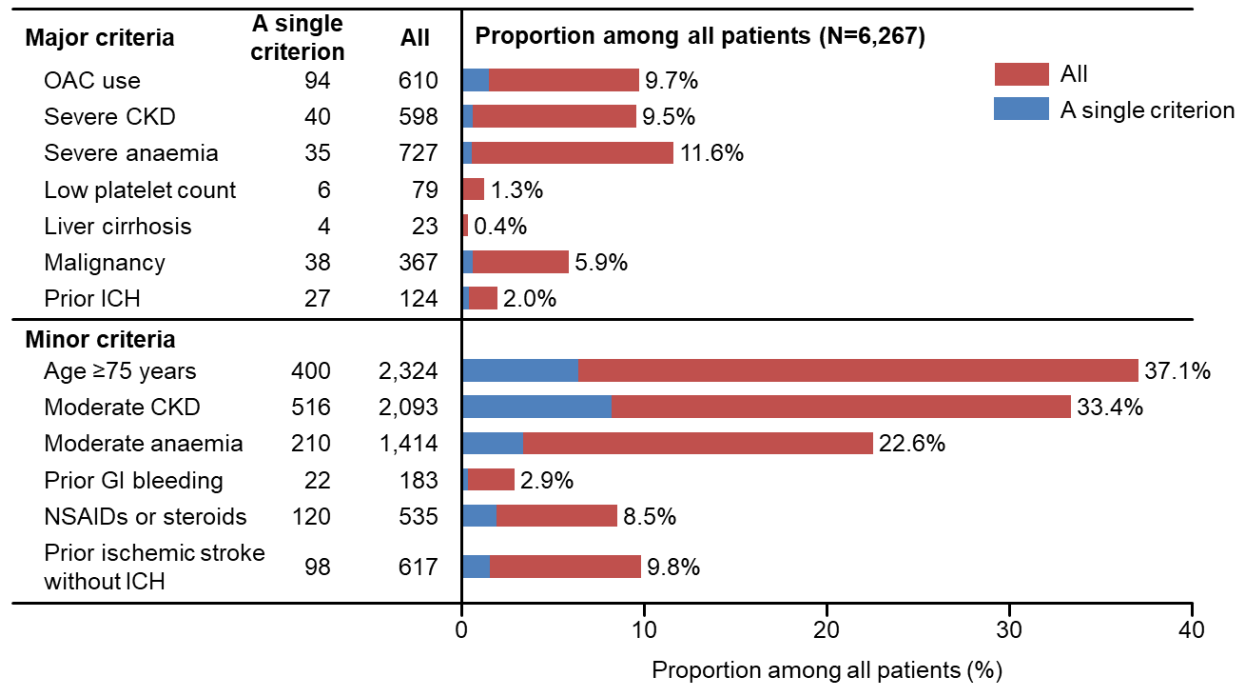

**Supplementary Figure 2.** Proportion of patients who fulfilled each ARC-HBR criterion.

ARC: Academic Research Consortium; CKD: chronic kidney disease; GI: gastrointestinal; ICH: intracranial haemorrhage; NSAIDs: non-steroidal anti-inflammatory drugs; OAC: oral anticoagulant

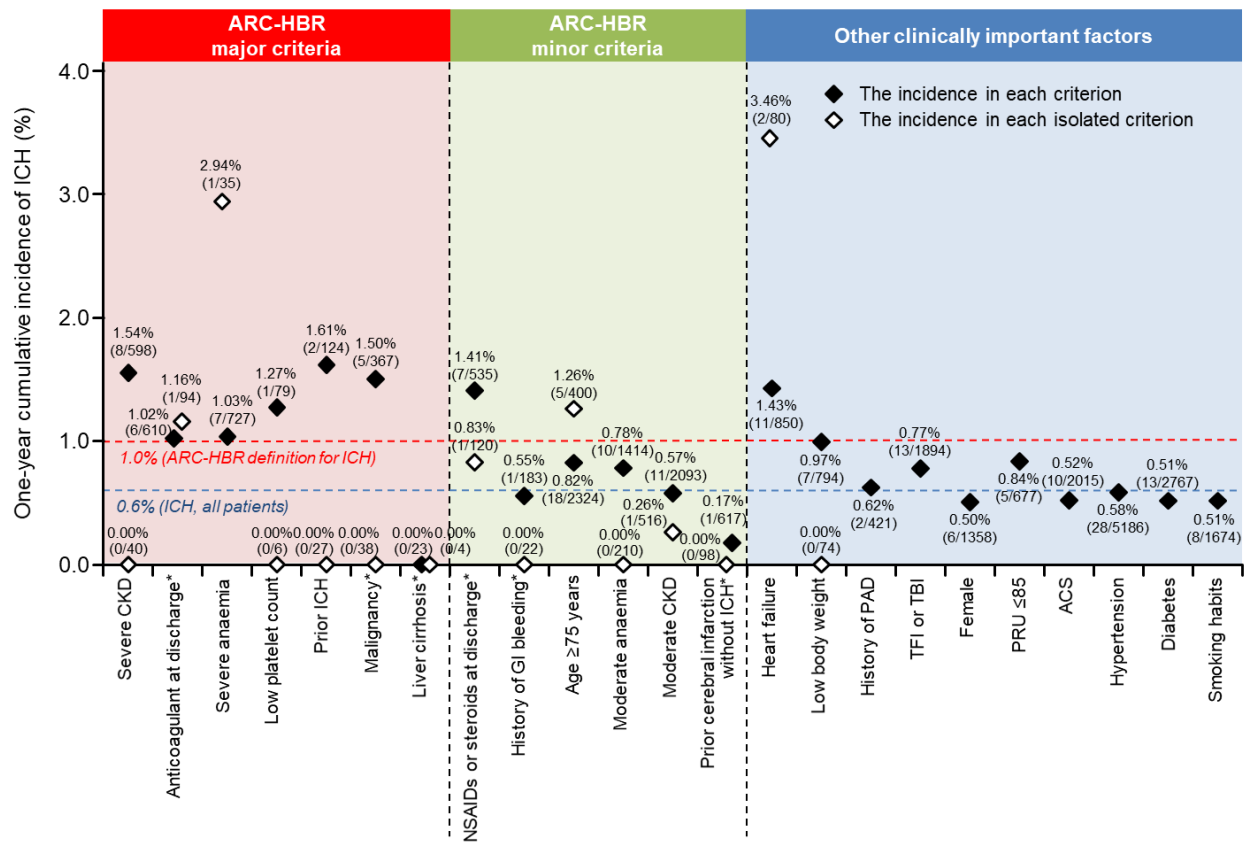

**Supplementary Figure 3.** Cumulative incidence of ICH stratified by ARC-HBR criteria and other clinically important factors.

\*Modified from the original ARC-HBR criteria.

ACS: acute coronary syndrome; ARC: Academic Research Consortium; CKD: chronic kidney disease; GI: gastrointestinal; HBR: high bleeding risk; ICH: intracranial haemorrhage; PAD: peripheral arterial disease; PRU: platelet reactivity unit; TBI: transbrachial intervention; TFI: transfemoral intervention.

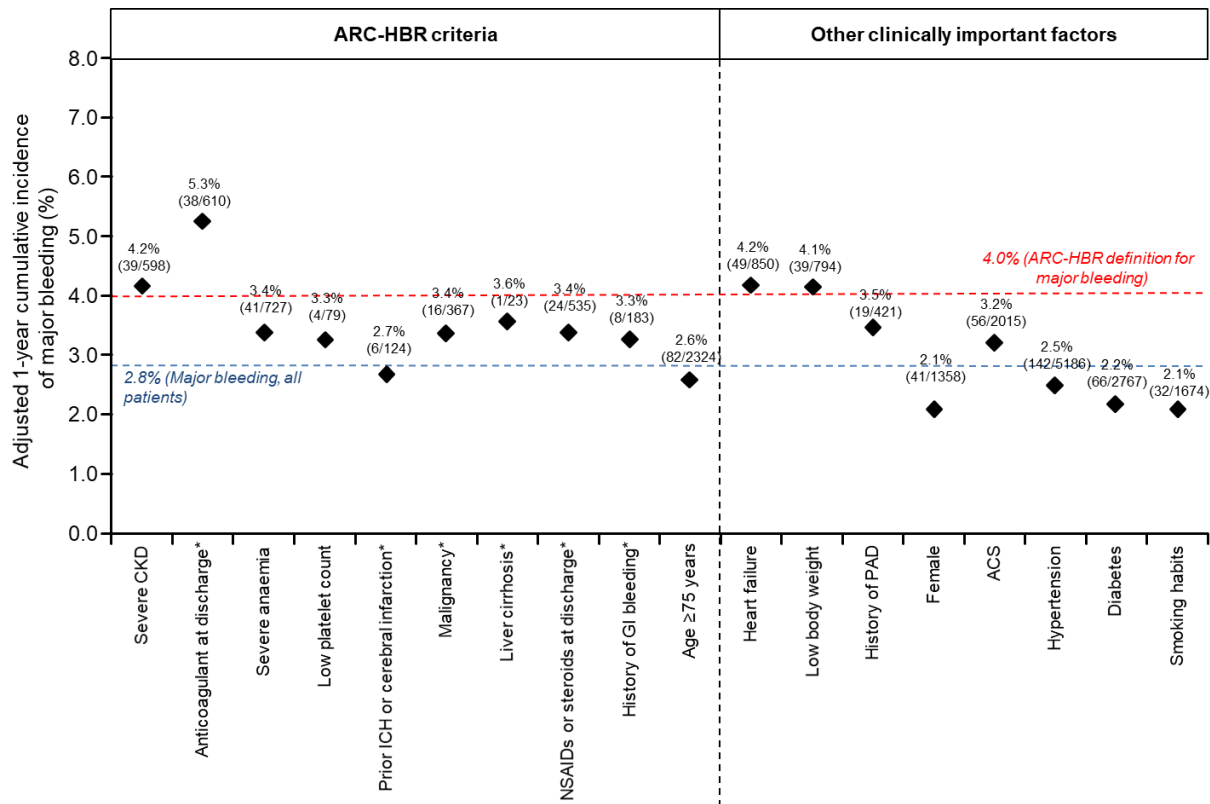

**Supplementary Figure 4.** Adjusted cumulative incidence of major bleeding stratified by ARC-HBR criteria and other clinically important factors.

\*Modified from the original ARC-HBR criteria.

ACS: acute coronary syndrome; ARC: Academic Research Consortium; CKD: chronic kidney disease; GI: gastrointestinal; HBR: high bleeding risk; ICH: intracranial haemorrhage; PAD: peripheral arterial disease

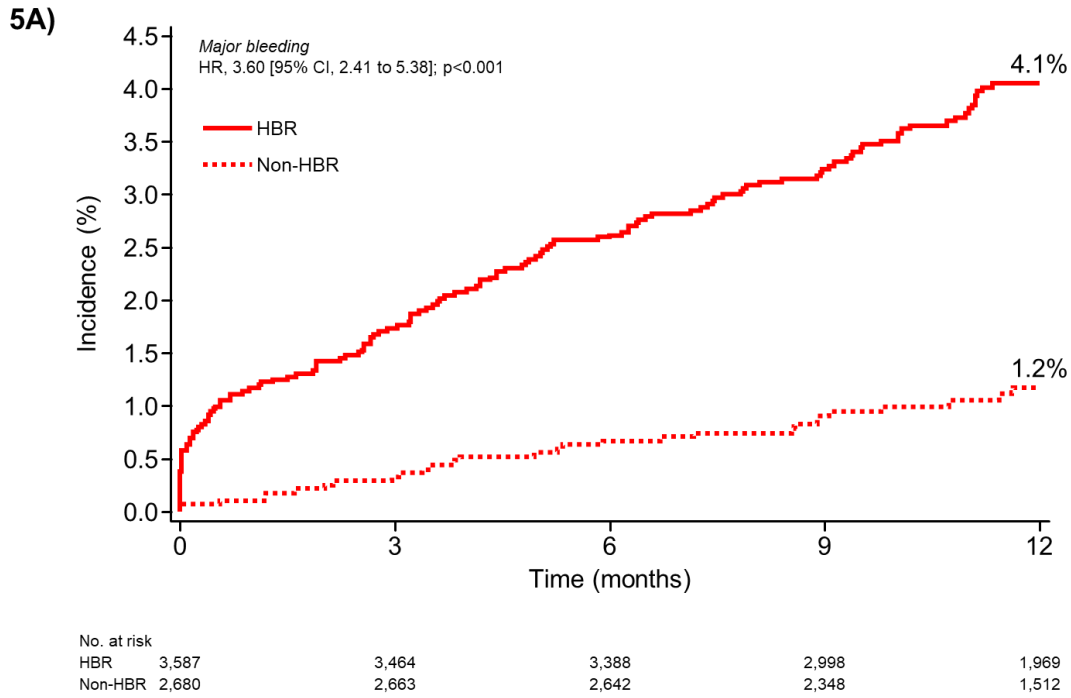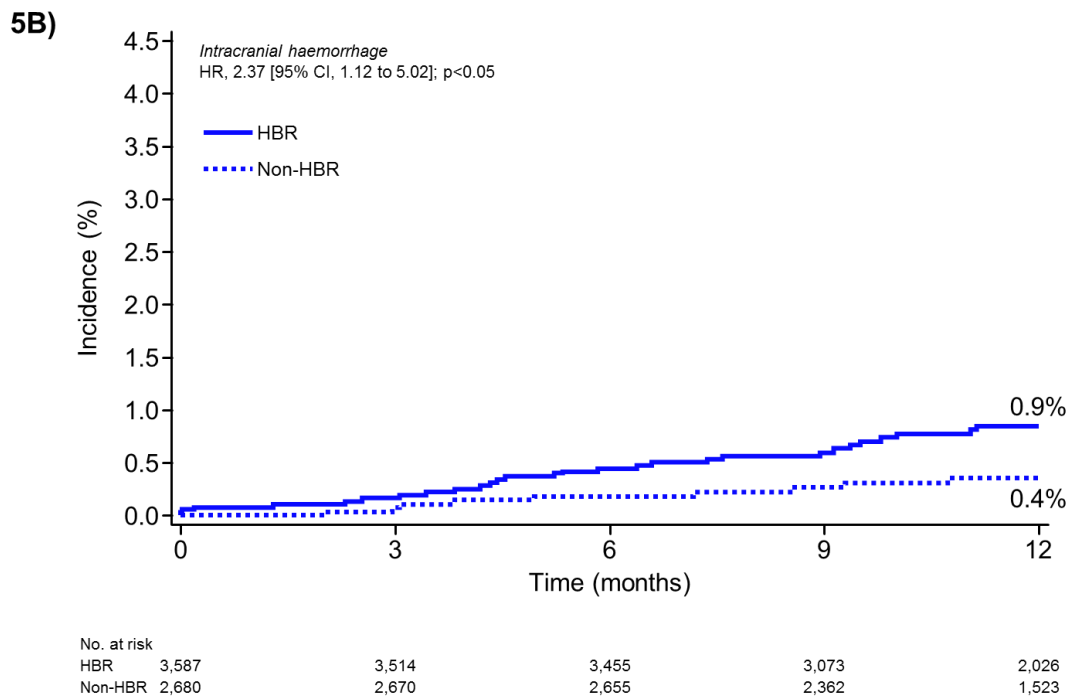

**Supplementary Figure 5.** Cumulative incidence of major bleeding (A) and intracranial haemorrhage (B) by ARC-HBR criteria plus low body weight and heart failure.

ARC: Academic Research Consortium; CI: confidence interval; HBR: high bleeding risk; HR: hazard ratio

6A)

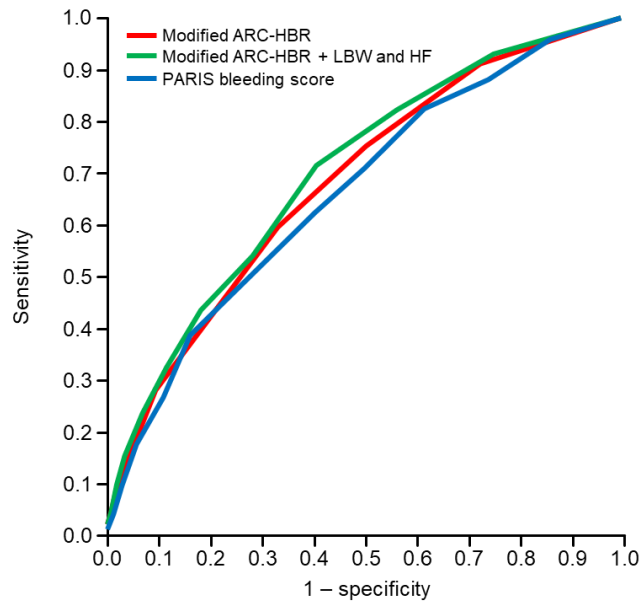

| Risk score (N=6,267)          | C-index (95% CI)      | Cut-off |
|-------------------------------|-----------------------|---------|
| Modified ARC-HBR              | 0.681 (0.641 – 0.722) | 1.5     |
| Modified ARC-HBR + LBW and HF | 0.700 (0.660 – 0.740) | 1.5     |
| PARIS major bleeding score    | 0.662 (0.620 – 0.704) | 9       |

| Criteria                           | HBR, n | Non-HBR, n | Sensitivity, % | Specificity, % |
|------------------------------------|--------|------------|----------------|----------------|
| Modified ARC-HBR (≥1)              | 3,185  | 3,082      | 75.2           | 49.8           |
| Modified ARC-HBR + LBW and HF (≥1) | 3,587  | 2,680      | 82.4           | 43.4           |
| PARIS major bleeding score (≥8)    | 1,692  | 4,575      | 48.5           | 73.6           |

6B)

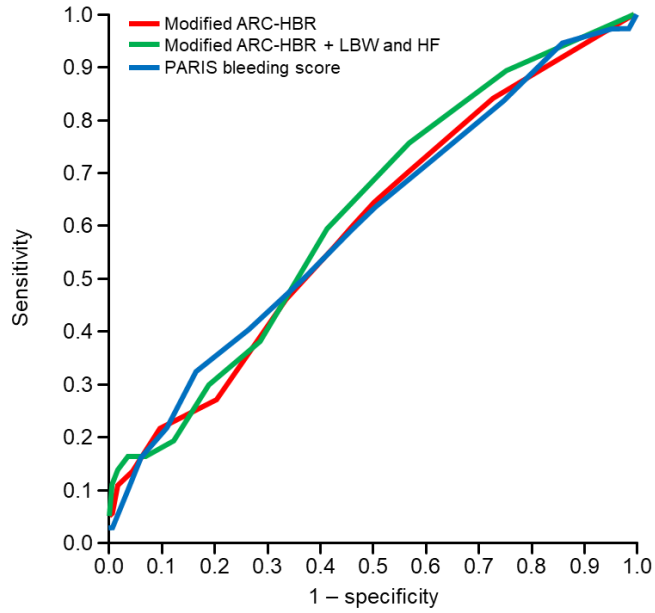

| Risk score (N=6,267)          | C-index (95% CI)      | Cut-off |
|-------------------------------|-----------------------|---------|
| Modified ARC-HBR              | 0.597 (0.505 – 0.689) | 1.0     |
| Modified ARC-HBR + LBW and HF | 0.620 (0.533 – 0.708) | 1.0     |
| PARIS major bleeding score    | 0.602 (0.508 – 0.697) | 9       |

| Criteria                                   | HBR, n | Non-HBR, n | Sensitivity, % | Specificity, % |
|--------------------------------------------|--------|------------|----------------|----------------|
| Modified ARC-HBR ( $\geq 1$ )              | 3,185  | 3,082      | 64.9           | 49.3           |
| Modified ARC-HBR + LBW and HF ( $\geq 1$ ) | 3,587  | 2,680      | 75.7           | 42.9           |
| PARIS major bleeding score ( $\geq 8$ )    | 1,692  | 4,575      | 40.5           | 73.1           |

**Supplementary Figure 6.** Receiver operating characteristic curve analysis of major bleeding (A) and intracranial haemorrhage (B) for each bleeding risk criterion category.

ARC: Academic Research Consortium; CI: confidence interval; HBR: high bleeding risk; HF: heart failure; LBW: low body weight

**Supplementary Table 1. Full methodological details of the PENDULUM (Platelet rEactivity in patieNts with DrUg eLUting stent and balancing risk of bleeding and ischeMic event) registry study<sup>7</sup>.**

| Item               | Details                                                                                                                                                                                                                                                                                                                                                                                                                                                                                                                                                                                                   |
|--------------------|-----------------------------------------------------------------------------------------------------------------------------------------------------------------------------------------------------------------------------------------------------------------------------------------------------------------------------------------------------------------------------------------------------------------------------------------------------------------------------------------------------------------------------------------------------------------------------------------------------------|
| Study design       | A prospective, multicentre study of Japanese patients who underwent PCI                                                                                                                                                                                                                                                                                                                                                                                                                                                                                                                                   |
| Enrolment period   | Between December 2015 and June 2017                                                                                                                                                                                                                                                                                                                                                                                                                                                                                                                                                                       |
| Setting            | 67 Japanese institutions, nationwide. Patients were followed up as part of routine clinical practice. Patients were expected to visit the hospital whenever possible, but could be questioned by telephone or letter if visits were difficult.                                                                                                                                                                                                                                                                                                                                                            |
| Inclusion criteria | Age $\geq$ 20 years<br>Indicated for PCI with drug-eluting stents<br>Administered antiplatelet drugs                                                                                                                                                                                                                                                                                                                                                                                                                                                                                                      |
| Exclusion criteria | Enrolment, or planned enrolment, in another clinical study before completion of the observation period                                                                                                                                                                                                                                                                                                                                                                                                                                                                                                    |
| DAPT details       | DAPT was based on the standard of care; drug type, dosage, and treatment duration were selected at the discretion of the attending physician<br>The standard duration of DAPT according to Japanese treatment guidelines is a minimum of 6 months for non-ACS patients and a minimum of 12 months for patients with ACS                                                                                                                                                                                                                                                                                   |
| Approved dosages   | Aspirin, 100 mg administered once daily; the dosage can be increased up to 300 mg once daily<br>Clopidogrel, 300 mg administered once as a loading dose on the treatment start day, followed by 75 mg once daily as a maintenance dosage<br>Prasugrel, 20 mg administered once as a loading dose, followed by 3.75 mg once daily as a maintenance dosage                                                                                                                                                                                                                                                  |
| Primary endpoints  | The incidence of first MACCE event <sup>a</sup> and first major bleeding event <sup>b</sup> 12 months after index PCI<br>Thrombotic and haemorrhagic events were evaluated by independent assessment committees                                                                                                                                                                                                                                                                                                                                                                                           |
| Sample size        | The required sample size for the registry was calculated based on both the incidence of MACCE and major bleeding at 12 months after index PCI<br>Published data suggested that in the Japanese population the incidence of MACCE was 3% and the incidence of major bleeding was 4%<br>Using this information, the incidence of the primary endpoints was set at 3% with a precision of $\pm$ 0.5% within the range of the 95% CI<br>Allowing for a withdrawal rate of 10% during the first 12 months of the study, the required number of patients was calculated as 4,969 (rounded up to 5,000 patients) |

<sup>a</sup>Defined as all-cause death, non-fatal myocardial infarction, non-fatal stroke, and stent thrombosis.

<sup>b</sup>Defined as Bleeding Academic Research Consortium types 3 and 5.



ACS: acute coronary syndrome; CI: confidence interval; DAPT: dual antiplatelet therapy; MACCE: major adverse cardiac and cerebrovascular events; PCI: percutaneous coronary intervention

**Supplementary Table 2. High bleeding risk definitions<sup>a</sup>.**

| ARC-HBR criteria <sup>1</sup>                                                                                           | This study                                                        | Category | Comments                    |
|-------------------------------------------------------------------------------------------------------------------------|-------------------------------------------------------------------|----------|-----------------------------|
| Age $\geq 75$ years                                                                                                     | Age $\geq 75$ years                                               | Minor    | Identical                   |
| Anticipated use of long-term oral anticoagulation <sup>b</sup>                                                          | Use of oral anticoagulation at discharge                          | Major    | Modified                    |
| Severe or end-stage chronic kidney disease (eGFR $< 30$ mL/min)                                                         | eGFR $< 30$ mL/min/1.73 m <sup>2</sup>                            | Major    | Identical                   |
| Moderate chronic kidney disease (eGFR 30–59 mL/min)                                                                     | eGFR 30– $< 60$ mL/min/1.73 m <sup>2</sup>                        | Minor    | Identical                   |
| Haemoglobin $< 11$ g/dL                                                                                                 | Haemoglobin $< 11$ g/dL                                           | Major    | Identical                   |
| Haemoglobin 11–12.9 g/dL for men and 11–11.9 g/dL for women                                                             | Haemoglobin 11– $< 13$ g/dL for men and 11– $< 12$ g/dL for women | Minor    | Identical                   |
| Spontaneous bleeding requiring hospitalisation or transfusion in the past 6 months or at any time, if recurrent         |                                                                   | Major    | Not applicable <sup>f</sup> |
| Spontaneous bleeding requiring hospitalisation or transfusion within the past 12 months not meeting the major criterion | Prior gastrointestinal bleeding at any time                       | Minor    | Modified                    |
| Moderate or severe baseline thrombocytopaenia <sup>c</sup> (platelet count $< 100 \times 10^9$ /L)                      | Platelet count $< 100 \times 10^9$ /L                             | Major    | Identical                   |
| Chronic bleeding diathesis                                                                                              |                                                                   | Major    | Not applicable              |
| Liver cirrhosis with portal hypertension                                                                                | Liver cirrhosis                                                   | Major    | Modified                    |
| Long-term use of oral NSAIDs or steroids                                                                                | Use of NSAIDs or steroids at discharge                            | Minor    | Modified                    |
| Active malignancy <sup>d</sup> (excluding non-melanoma skin cancer) within the past 12 months                           | Malignancy at baseline (undergoing or planning treatment)         | Major    | Modified                    |

|                                                                                                                                                                                                                                                                     |                                                                                       |       |                |
|---------------------------------------------------------------------------------------------------------------------------------------------------------------------------------------------------------------------------------------------------------------------|---------------------------------------------------------------------------------------|-------|----------------|
| Previous spontaneous intracranial haemorrhage (at any time)<br>Previous traumatic intracranial haemorrhage within the past 12 months<br>Presence of a brain arteriovenous malformation<br>Moderate or severe ischaemic stroke <sup>e</sup> within the past 6 months | History of intracranial haemorrhage at any time                                       | Major | Modified       |
| Any ischaemic stroke at any time not meeting the major criterion                                                                                                                                                                                                    | History of ischaemic stroke <sup>g</sup> without intracranial haemorrhage at any time | Minor | Identical      |
| Non-deferrable major surgery on dual antiplatelet therapy                                                                                                                                                                                                           |                                                                                       | Major | Not applicable |
| Recent major surgery or major trauma within 30 days before PCI                                                                                                                                                                                                      |                                                                                       | Major | Not applicable |

<sup>a</sup>Definition of ARC-HBR: meets at least one of the major criteria or at least two of the minor criteria. The major and minor criteria were defined differently for the original article and the current analysis, as shown.

<sup>b</sup>This excludes vascular protection doses.

<sup>c</sup>Baseline thrombocytopenia is defined as thrombocytopenia before PCI.

<sup>d</sup>Active malignancy is defined as diagnosis within 12 months and/or ongoing requirement for treatment (including surgery, chemotherapy, or radiotherapy).

<sup>e</sup>National Institutes of Health Stroke Scale score  $\geq 5$ .

<sup>f</sup>For the present analysis, “Spontaneous bleeding requiring hospitalisation or transfusion within the past 12 months not meeting the major criterion” was combined with “Spontaneous bleeding requiring hospitalisation or transfusion in the past 6 months or at any time, if recurrent”, to form the major criterion “Composite of prior bleeding”.

<sup>g</sup>For the present analysis, “Any ischaemic stroke at any time not meeting the major criterion” was combined with “Moderate or severe ischaemic stroke within the past 6 months”, to form the major criterion “History of ischaemic stroke”.

ARC: Academic Research Consortium; eGFR: estimated glomerular filtration rate; HBR: high bleeding risk; NSAIDs: non-steroidal anti-inflammatory drugs; PCI: percutaneous coronary intervention

**Supplementary Table 3. Baseline laboratory parameters.**

| <b>Characteristics</b>                          | <b>Total<br/>(N=6,267)</b> | <b>ARC-HBR<br/>(n=3,185)</b> | <b>Non-ARC-<br/>HBR<br/>(n=3,082)</b> | <b>p-value<br/>(ARC-HBR vs<br/>non-ARC-<br/>HBR)</b> |
|-------------------------------------------------|----------------------------|------------------------------|---------------------------------------|------------------------------------------------------|
| Haemoglobin, g/dL                               | N=6,087                    | N=3,108                      | N=2,979                               |                                                      |
| Mean (SD)                                       | 13.3 (2.0)                 | 12.3 (1.9)                   | 14.4 (1.6)                            | <0.001                                               |
| <11                                             | 727 (11.6)                 | 727 (22.8)                   | 0 (0.0)                               | <0.001                                               |
| Male: ≥11 to <13;<br>Female: ≥11 to <12         | 1,414 (22.6)               | 1,204 (37.8)                 | 210 (6.8)                             | <0.001                                               |
| eGFR, mL/min/1.73 m <sup>2</sup>                | N=6,122                    | N=3,133                      | N=2,989                               |                                                      |
| Mean (SD)                                       | 61.2 (27.6)                | 49.6 (23.5)                  | 73.4 (26.3)                           | <0.001                                               |
| <30                                             | 598 (9.5)                  | 598 (18.8)                   | 0 (0.0)                               | <0.001                                               |
| ≥30 to <60                                      | 2,093 (33.4)               | 1,577 (49.5)                 | 516 (16.7)                            |                                                      |
| White blood cell count,<br>×10 <sup>3</sup> /μL | N=6,086                    | N=3,108                      | N=2,978                               |                                                      |
| Mean (SD)                                       | 6.94 (2.82)                | 6.70 (2.51)                  | 7.19 (3.09)                           | <0.001                                               |
| Platelet count, ×10 <sup>4</sup> /μL            | N=6,084                    | N=3,107                      | N=2,977                               |                                                      |
| Mean (SD)                                       | 21.4 (6.6)                 | 20.6 (6.9)                   | 22.1 (6.3)                            | <0.001                                               |
| <10                                             | 79 (1.3)                   | 79 (2.5)                     | 0 (0.0)                               | <0.001                                               |
| <b>No. of diseased vessels</b>                  |                            |                              |                                       |                                                      |
| 1                                               | 3,165 (50.5)               | 1,476 (46.3)                 | 1,689 (54.8)                          | <0.001                                               |
| 2                                               | 1,865 (29.8)               | 987 (31.0)                   | 878 (28.5)                            | <0.05                                                |
| 3                                               | 1,151 (18.4)               | 680 (21.4)                   | 471 (15.3)                            | <0.001                                               |
| Left main coronary<br>trunk                     | 349 (5.6)                  | 202 (6.3)                    | 147 (4.8)                             | <0.05                                                |
| <b>Procedural data</b>                          |                            |                              |                                       |                                                      |
| <b>Puncture site</b>                            |                            |                              |                                       |                                                      |
| Femoral                                         | 1,632 (26.0)               | 986 (31.0)                   | 646 (21.0)                            | <0.001                                               |
| Brachial                                        | 270 (4.3)                  | 177 (5.6)                    | 93 (3.0)                              | <0.001                                               |
| Radial                                          | 4,516 (72.1)               | 2,082 (65.4)                 | 2,434 (79.0)                          | <0.001                                               |
| <b>Imaging guided</b>                           |                            |                              |                                       |                                                      |

|                                |              |              |              |       |
|--------------------------------|--------------|--------------|--------------|-------|
| IVUS or OCT/OFDI               | 5,918 (94.4) | 2,999 (94.2) | 2,919 (94.7) | 0.342 |
| Complex PCI                    |              |              |              |       |
| All                            | 1,712 (27.3) | 676 (21.2)   | 604 (19.6)   | 0.110 |
| ≥3 stents                      | 435 (6.9)    | 247 (7.8)    | 188 (6.1)    | <0.05 |
| Number of treatment lesions ≥3 | 577 (9.2)    | 311 (9.8)    | 266 (8.6)    | 0.121 |
| Bifurcation with 2 stents      | 112 (1.8)    | 49 (1.5)     | 63 (2.0)     | 0.131 |
| Total stent length >60 mm      | 725 (11.6)   | 401 (12.6)   | 324 (10.5)   | <0.05 |
| Chronic total occlusion lesion | 429 (6.8)    | 202 (6.3)    | 227 (7.4)    | 0.109 |

Data are presented as n (%) or mean (SD).

ARC: Academic Research Consortium; eGFR: estimated glomerular filtration rate; HBR: high bleeding risk; IVUS: intravascular ultrasound; OCT: optical coherence tomography; OFDI: optical frequency domain imaging; PCI: percutaneous coronary intervention; SD: standard deviation

**Supplementary Table 4. The proportion of events in each combination of criteria.**

| Criteria                                                         | Patients with criteria | Events         |          |
|------------------------------------------------------------------|------------------------|----------------|----------|
|                                                                  |                        | Major bleeding | ICH      |
| <b>Total</b>                                                     | 6,267                  | 165 (2.6)      | 37 (0.6) |
| <b>1 minor criterion (point: 0.5)</b>                            |                        |                |          |
| History of GI bleeding                                           | 22                     | 0 (0.0)        | 0 (0.0)  |
| Moderate anaemia                                                 | 210                    | 4 (1.9)        | 0 (0.0)  |
| Moderate CKD                                                     | 516                    | 8 (1.6)        | 1 (0.2)  |
| NSAIDs or steroids                                               | 120                    | 2 (1.7)        | 1 (0.8)  |
| ≥75 years                                                        | 400                    | 12 (3.0)       | 5 (1.3)  |
| History of ischaemic stroke without ICH                          | 98                     | 0 (0.0)        | 0 (0.0)  |
| <b>1 major criterion (point: 1)</b>                              |                        |                |          |
| Severe anaemia                                                   | 35                     | 2 (5.7)        | 1 (2.9)  |
| Low platelet count                                               | 6                      | 0 (0.0)        | 0 (0.0)  |
| Severe CKD                                                       | 40                     | 0 (0.0)        | 0 (0.0)  |
| OAC use                                                          | 94                     | 7 (7.4)        | 1 (1.1)  |
| Liver cirrhosis                                                  | 4                      | 0 (0.0)        | 0 (0.0)  |
| Malignancy                                                       | 38                     | 1 (2.6)        | 0 (0.0)  |
| History of ICH                                                   | 27                     | 0 (0.0)        | 0 (0.0)  |
| <b>Combination of 2 minor criteria (point: 1)</b>                |                        |                |          |
| History of GI bleeding + moderate anaemia                        | 5                      | 0 (0.0)        | 0 (0.0)  |
| History of GI bleeding + moderate CKD                            | 10                     | 1 (10.0)       | 0 (0.0)  |
| History of GI bleeding + NSAIDs or steroids                      | 2                      | 0 (0.0)        | 0 (0.0)  |
| History of GI bleeding + ≥75 years                               | 8                      | 0 (0.0)        | 0 (0.0)  |
| History of GI bleeding + history of ischaemic stroke without ICH | 1                      | 0 (0.0)        | 0 (0.0)  |
| Moderate anaemia + moderate CKD                                  | 130                    | 6 (4.6)        | 2 (1.5)  |
| Moderate anaemia + NSAIDs or steroids                            | 16                     | 1 (6.3)        | 0 (0.0)  |
| Moderate anaemia + ≥75 years                                     | 159                    | 2 (1.3)        | 0 (0.0)  |
| Moderate anaemia + history of ischaemic stroke without ICH       | 22                     | 0 (0.0)        | 0 (0.0)  |
| Moderate CKD + NSAIDs or steroids                                | 35                     | 2 (5.7)        | 1 (2.9)  |
| Moderate CKD + ≥75 years                                         | 304                    | 2 (0.7)        | 2 (0.7)  |
| Moderate CKD + history of ischaemic stroke without ICH           | 38                     | 1 (2.6)        | 0 (0.0)  |
| NSAIDs or steroids + ≥75 years                                   | 38                     | 0 (0.0)        | 0 (0.0)  |

|                                                                                       |     |          |         |
|---------------------------------------------------------------------------------------|-----|----------|---------|
| NSAIDs or steroids + history of ischaemic stroke without ICH                          | 8   | 1 (12.5) | 0 (0.0) |
| ≥75 years + history of ischaemic stroke without ICH                                   | 51  | 0 (0.0)  | 0 (0.0) |
| <b>Combination of 3 minor criteria (point: 1.5)</b>                                   |     |          |         |
| History of GI bleeding + moderate anaemia + moderate CKD                              | 9   | 0 (0.0)  | 0 (0.0) |
| History of GI bleeding + moderate anaemia + NSAIDs or steroids                        | 2   | 0 (0.0)  | 0 (0.0) |
| History of GI bleeding + moderate anaemia + ≥75 years                                 | 9   | 1 (11.1) | 0 (0.0) |
| History of GI bleeding + moderate anaemia + history of ischaemic stroke without ICH   | 0   | —        | —       |
| History of GI bleeding + moderate CKD + NSAIDs or steroids                            | 0   | —        | —       |
| History of GI bleeding + moderate CKD + ≥75 years                                     | 2   | 0 (0.0)  | 0 (0.0) |
| History of GI bleeding + moderate CKD + history of ischaemic stroke without ICH       | 0   | —        | —       |
| History of GI bleeding + NSAIDs or steroids + ≥75 years                               | 2   | 0 (0.0)  | 0 (0.0) |
| History of GI bleeding + NSAIDs or steroids + history of ischaemic stroke without ICH | 0   | —        | —       |
| History of GI bleeding + ≥75 years + history of ischaemic stroke without ICH          | 2   | 0 (0.0)  | 0 (0.0) |
| Moderate anaemia + moderate CKD + NSAIDs or steroids                                  | 17  | 2 (11.8) | 0 (0.0) |
| Moderate anaemia + moderate CKD + ≥75 years                                           | 193 | 7 (3.6)  | 2 (1.0) |
| Moderate anaemia + moderate CKD + history of ischaemic stroke without ICH             | 22  | 0 (0.0)  | 0 (0.0) |
| Moderate anaemia + NSAIDs or steroids + ≥75 years                                     | 14  | 1 (7.1)  | 1 (7.1) |
| Moderate anaemia + NSAIDs or steroids + history of ischaemic stroke without ICH       | 1   | 0 (0.0)  | 0 (0.0) |
| Moderate anaemia + ≥75 years + history of ischaemic stroke without ICH                | 21  | 0 (0.0)  | 0 (0.0) |
| Moderate CKD + NSAIDs or steroids + ≥75 years                                         | 30  | 1 (3.3)  | 0 (0.0) |
| Moderate CKD + NSAIDs or steroids + history of ischaemic stroke without ICH           | 1   | 0 (0.0)  | 0 (0.0) |

|                                                                                |    |          |         |
|--------------------------------------------------------------------------------|----|----------|---------|
| Moderate CKD + $\geq 75$ years + history of ischaemic stroke without ICH       | 33 | 0 (0.0)  | 0 (0.0) |
| NSAIDs or steroids + $\geq 75$ years + history of ischaemic stroke without ICH | 4  | 0 (0.0)  | 0 (0.0) |
| <b>Combination of 1 major and 1 minor criteria (point: 1.5)</b>                |    |          |         |
| Severe anaemia + history of GI bleeding                                        | 5  | 0 (0.0)  | 0 (0.0) |
| Severe anaemia + moderate anaemia                                              | 0  | —        | —       |
| Severe anaemia + moderate CKD                                                  | 37 | 1 (2.7)  | 0 (0.0) |
| Severe anaemia + NSAIDs or steroids                                            | 10 | 0 (0.0)  | 0 (0.0) |
| Severe anaemia + $\geq 75$ years                                               | 43 | 1 (2.3)  | 0 (0.0) |
| Severe anaemia + history of ischaemic stroke without ICH                       | 2  | 0 (0.0)  | 0 (0.0) |
| Low platelet count + history of GI bleeding                                    | 0  | —        | —       |
| Low platelet count + moderate anaemia                                          | 3  | 0 (0.0)  | 0 (0.0) |
| Low platelet count + moderate CKD                                              | 3  | 0 (0.0)  | 0 (0.0) |
| Low platelet count + NSAIDs or steroids                                        | 0  | —        | —       |
| Low platelet count + $\geq 75$ years                                           | 2  | 0 (0.0)  | 0 (0.0) |
| Low platelet count + history of ischaemic stroke without ICH                   | 1  | 0 (0.0)  | 0 (0.0) |
| Severe CKD + history of GI bleeding                                            | 1  | 0 (0.0)  | 0 (0.0) |
| Severe CKD + moderate anaemia                                                  | 81 | 5 (6.2)  | 3 (3.7) |
| Severe CKD + moderate CKD                                                      | 0  | —        | —       |
| Severe CKD + NSAIDs or steroids                                                | 9  | 0 (0.0)  | 0 (0.0) |
| Severe CKD + $\geq 75$ years                                                   | 23 | 3 (13.0) | 0 (0.0) |
| Severe CKD + history of ischaemic stroke without ICH                           | 5  | 0 (0.0)  | 0 (0.0) |
| OAC use + history of GI bleeding                                               | 3  | 0 (0.0)  | 0 (0.0) |
| OAC use + moderate anaemia                                                     | 28 | 2 (7.1)  | 0 (0.0) |
| OAC use + moderate CKD                                                         | 53 | 2 (3.8)  | 0 (0.0) |
| OAC use + NSAIDs or steroids                                                   | 8  | 0 (0.0)  | 0 (0.0) |
| OAC use + $\geq 75$ years                                                      | 39 | 2 (5.1)  | 0 (0.0) |
| OAC use + history of ischaemic stroke without ICH                              | 15 | 1 (6.7)  | 1 (6.7) |
| Liver cirrhosis + history of GI bleeding                                       | 0  | —        | —       |
| Liver cirrhosis + moderate anaemia                                             | 1  | 0 (0.0)  | 0 (0.0) |
| Liver cirrhosis + moderate CKD                                                 | 0  | —        | —       |
| Liver cirrhosis + NSAIDs or steroids                                           | 0  | —        | —       |
| Liver cirrhosis + $\geq 75$ years                                              | 0  | —        | —       |



|                                                                    |    |         |         |
|--------------------------------------------------------------------|----|---------|---------|
| Liver cirrhosis + history of ischaemic stroke without ICH          | 0  | —       | —       |
| Malignancy + history of GI bleeding                                | 1  | 0 (0.0) | 0 (0.0) |
| Malignancy + moderate anaemia                                      | 17 | 0 (0.0) | 0 (0.0) |
| Malignancy + moderate CKD                                          | 19 | 0 (0.0) | 0 (0.0) |
| Malignancy + NSAIDs or steroids                                    | 4  | 0 (0.0) | 0 (0.0) |
| Malignancy + $\geq 75$ years                                       | 35 | 0 (0.0) | 0 (0.0) |
| Malignancy + history of ischaemic stroke without ICH               | 2  | 0 (0.0) | 0 (0.0) |
| History of ICH + history of GI bleeding                            | 0  | —       | —       |
| History of ICH + moderate anaemia                                  | 9  | 0 (0.0) | 0 (0.0) |
| History of ICH + moderate CKD                                      | 8  | 0 (0.0) | 0 (0.0) |
| History of ICH + NSAIDs or steroids                                | 0  | —       | —       |
| History of ICH + $\geq 75$ years                                   | 5  | 0 (0.0) | 0 (0.0) |
| History of ICH + history of ischaemic stroke without ICH           | 0  | —       | —       |
| <b>1 major criterion (point: 1) * East Asian-specific HBR only</b> |    |         |         |
| Body weight $\leq 50$ kg                                           | 74 | 0 (0.0) | 0 (0.0) |
| Heart failure                                                      | 80 | 2 (2.5) | 2 (2.5) |

Data are presented as n (%).

CKD: chronic kidney disease; GI: gastrointestinal; HBR: high bleeding risk; ICH: intracranial haemorrhage; NSAIDs: non-steroidal anti-inflammatory drugs; OAC: oral anticoagulant
